# Supplementary material for: Directed functional brain connectivity is altered in sub-threshold amyloid-β accumulators
Source: bioRxiv or medRxiv preprint supplement (doi:10.1101/2022.10.26.22281539), 2022-10-27
Supplement: Supplementary file [file media-1.pdf]

**Directed functional brain connectivity is altered in sub-threshold amyloid- $\beta$  accumulators**

**Supplementary Information**

**Mite Mijalkov<sup>1,\*</sup>, Dániel Veréb<sup>1</sup>, Anna Canal-Garcia<sup>1</sup>, Giovanni Volpe<sup>2</sup>, Joana B. Pereira<sup>1,3,\*</sup>, Alzheimer's Disease Neuroimaging Initiative**

<sup>1</sup> Department of Neurobiology, Care Sciences and Society, Karolinska Institutet, Stockholm, Sweden.

<sup>2</sup> Department of Physics, Goteborg University, Goteborg, Sweden.

<sup>3</sup> Memory Research Unit, Department of Clinical Sciences Malmö, Lund University, Lund, Sweden.

\* Corresponding authors: Mite Mijalkov and Joana B. Pereira,

Address: KI, Dept. NVS, division of clinical geriatrics, Neo 7th floor, Blickagången 16, 141 83 Huddinge, Sweden.

\emails: mite.mijalkov@ki.se // joana.pereira@ki.se

A) Lag 2: Clustering coefficient

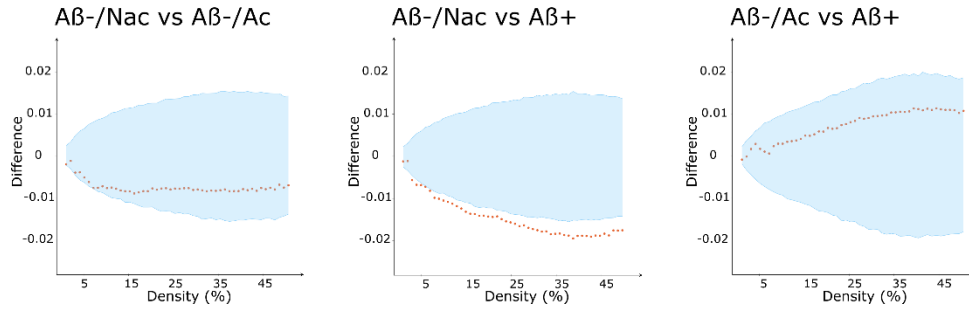

B) Lag 4: Clustering coefficient

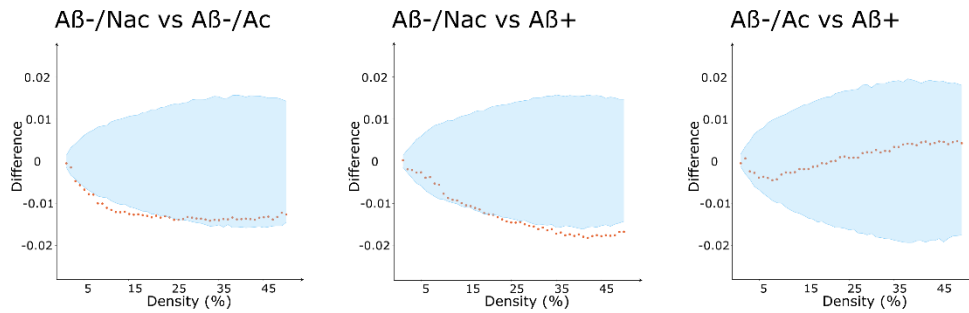

C) Lag 2: Global efficiency

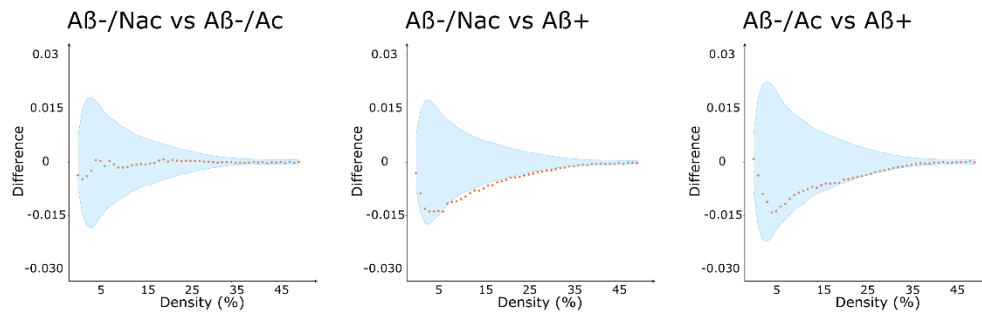

D) Lag 4: Global efficiency

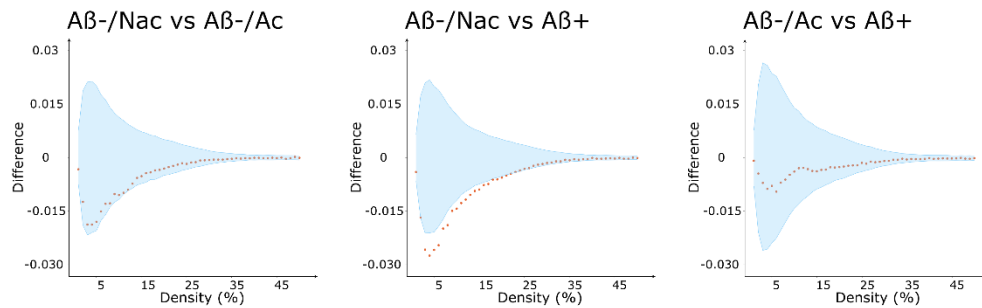

**Fig S1. Differences between different groups in global directed functional network topology.** Between-group differences (calculated as group 2 - group 1 in the figure) in clustering coefficient at A) lag 2 and B) lag 4 as well as in global efficiency at C) lag 2 and D) lag 4. Orange circles represent the differences in the corresponding network measures as a function of network density; the upper and lower bounds of the 95% confidence intervals (CI) are plotted in blue. Differences are considered statistically significant if they fall outside the CIs.
